# Supplementary material for: Synthesis, DNA binding and biological evaluation of benzimidazole Schiff base ligands and their metal(ii) complexes
Source: Royal Society of Chemistry journal article supplement (doi:10.1039/d3ra00982c), 2023-01-01
Supplement: d3ra00982c1.pdf [file d3ra00982c1.pdf]

Supplementary Data

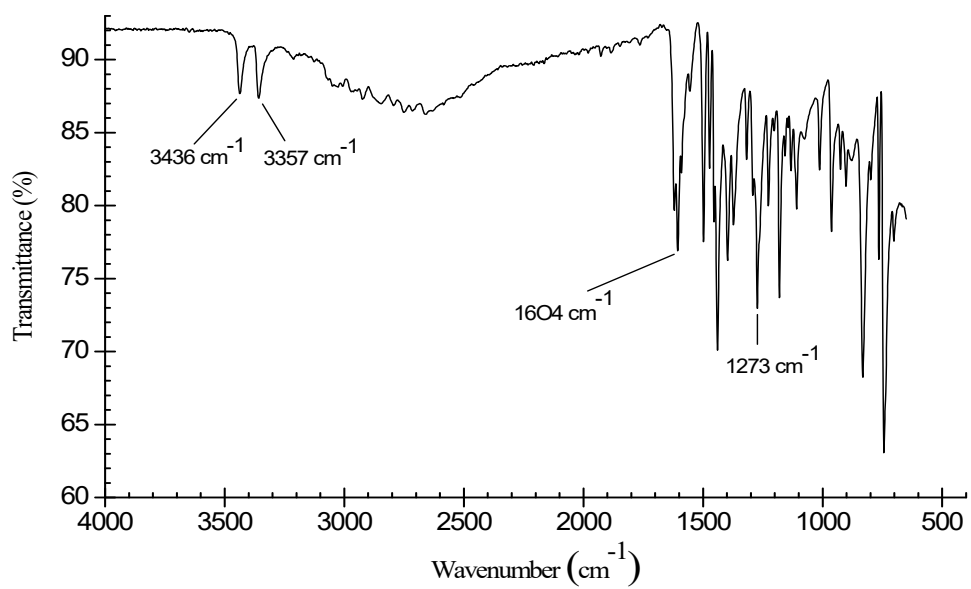

Figure S1. Infrared spectrum of A-1

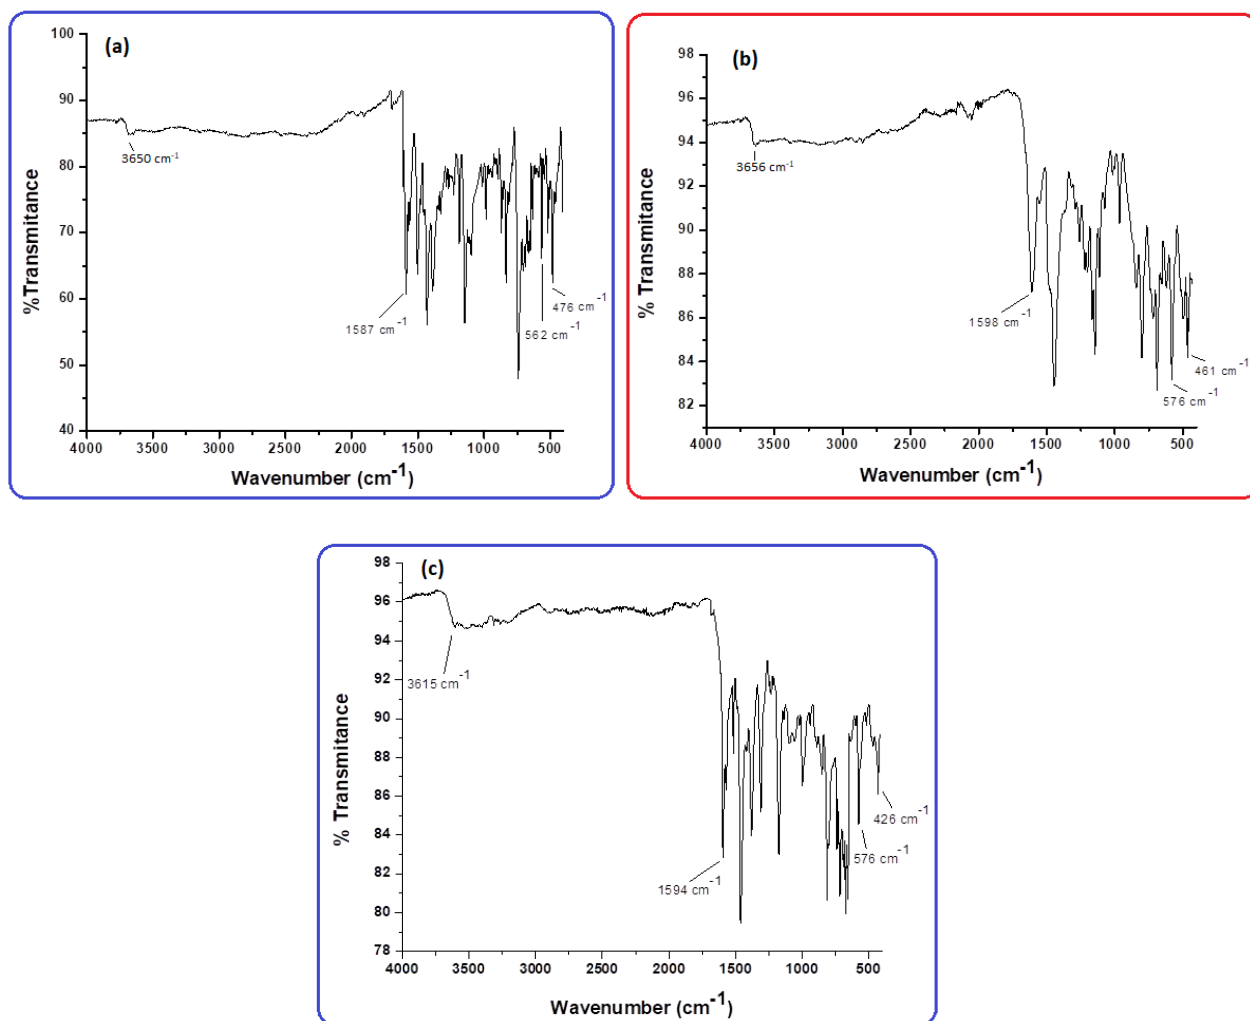

Figure S2. Infrared spectra of Complexes 2 (a), 3 (b) and 4 (c)

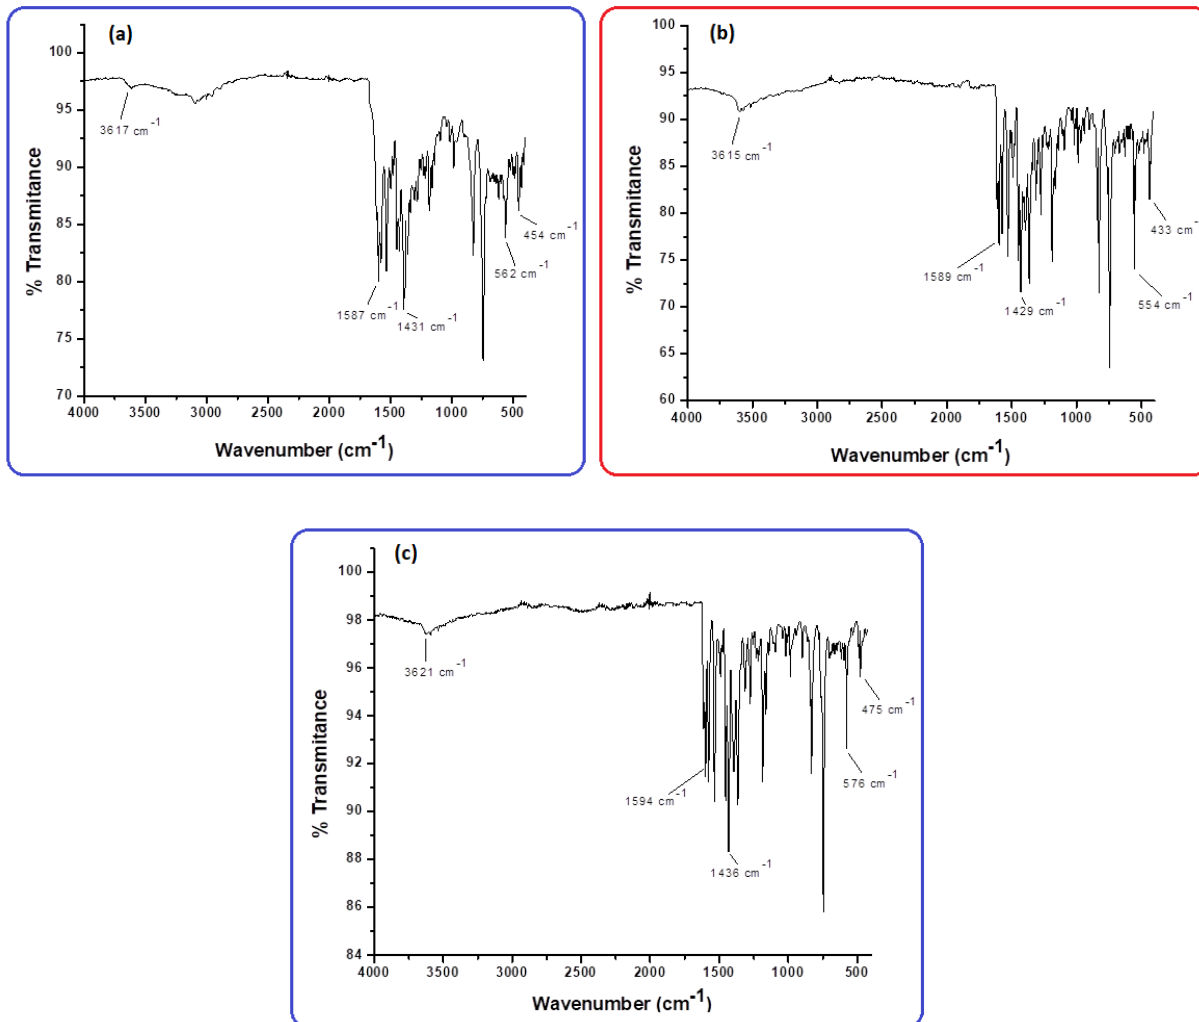

Figure S3. Infrared spectra of Complexes 6 (a), 7 (b) and 8 (c)

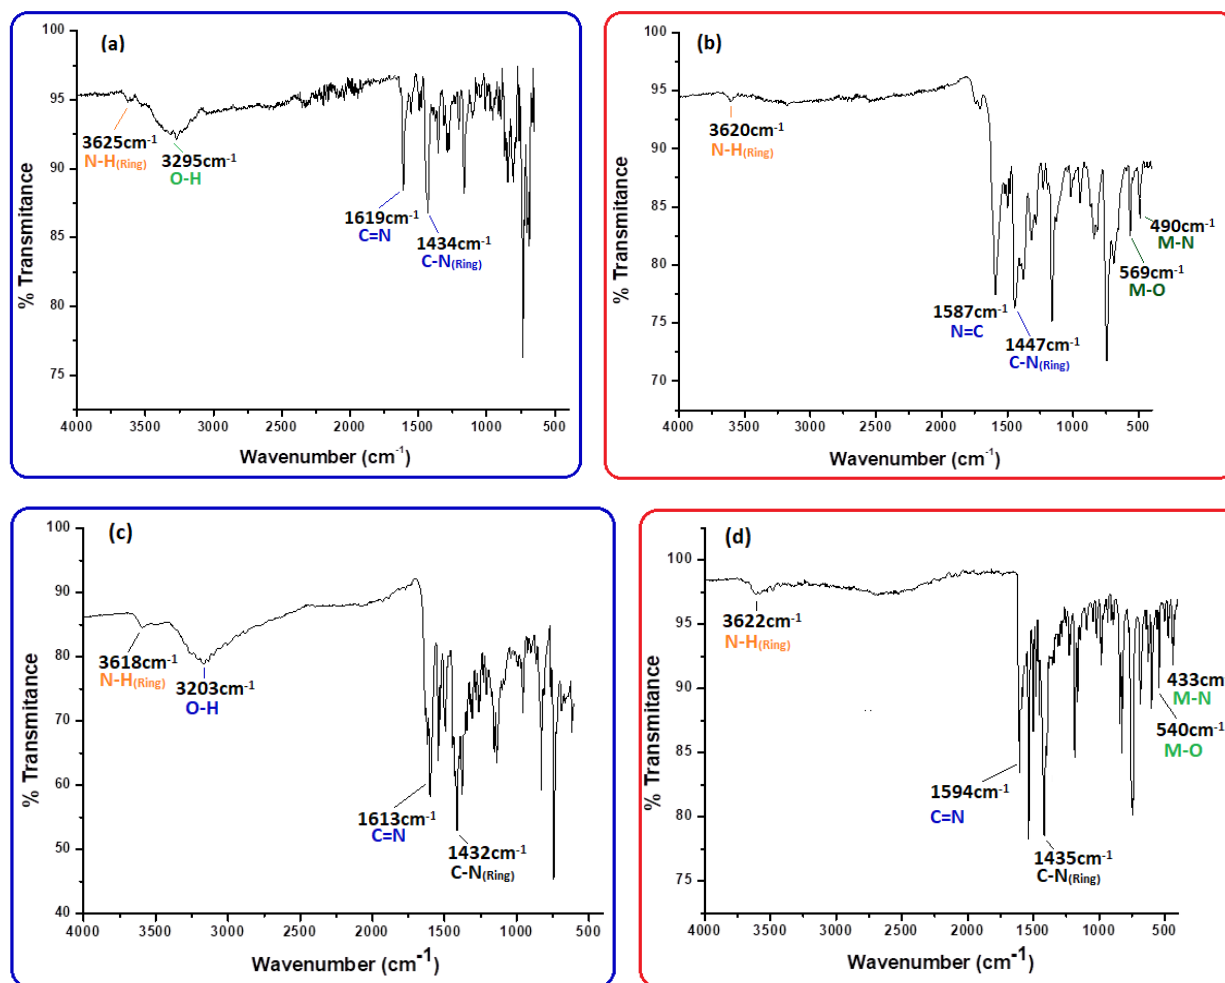

Fig. S4. Representative FT-IR spectra of ligands  $L_1$  (a),  $L_2$  (c) and Cu(II) complexes (1) (b), 5 (d).

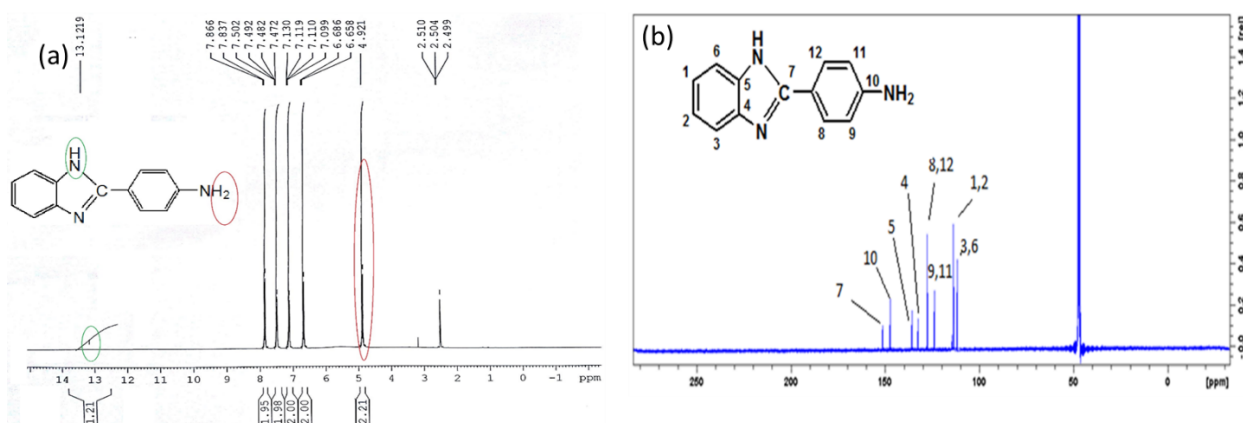

Figure S5.  $^1\text{H}$  NMR (a) and  $^{13}\text{C}$  NMR (b) spectra of A-1 in  $\text{DMSO-d}_6$

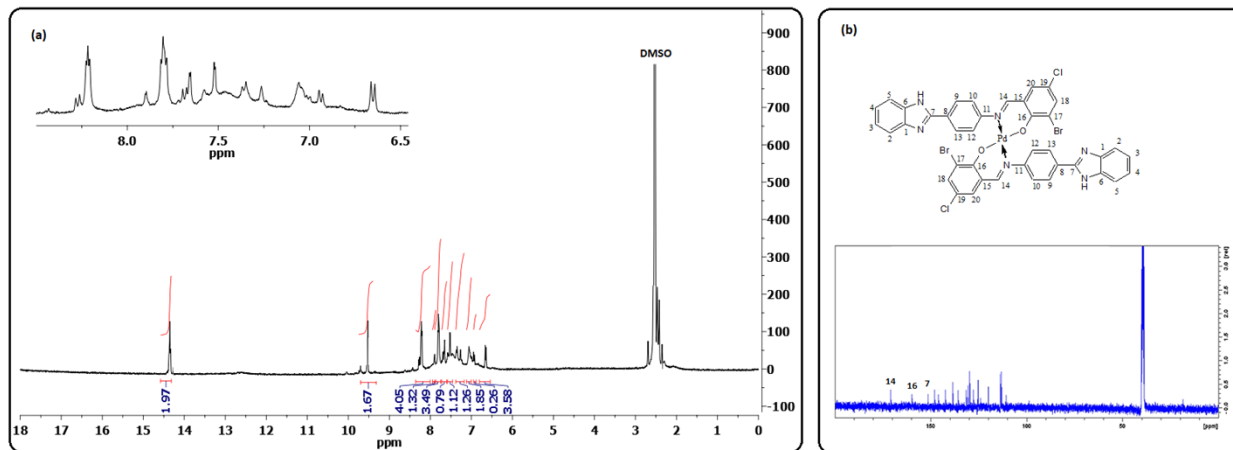

Figure S6.  $^1\text{H}$  NMR (a) and  $^{13}\text{C}$  NMR (b) spectra of Ni(II) complex **2** in DMSO- $d_6$

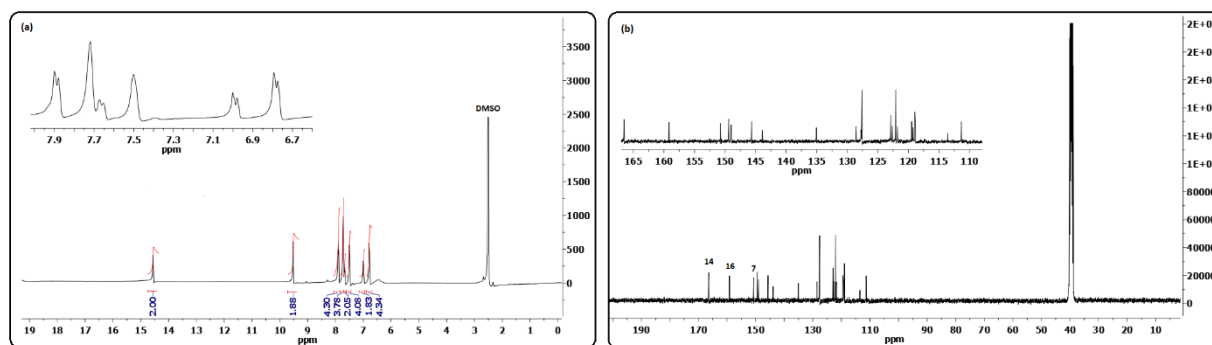

Figure S7.  $^1\text{H}$  NMR (a) and  $^{13}\text{C}$  NMR (b) spectra of Pd(II) complex **3** in DMSO- $d_6$

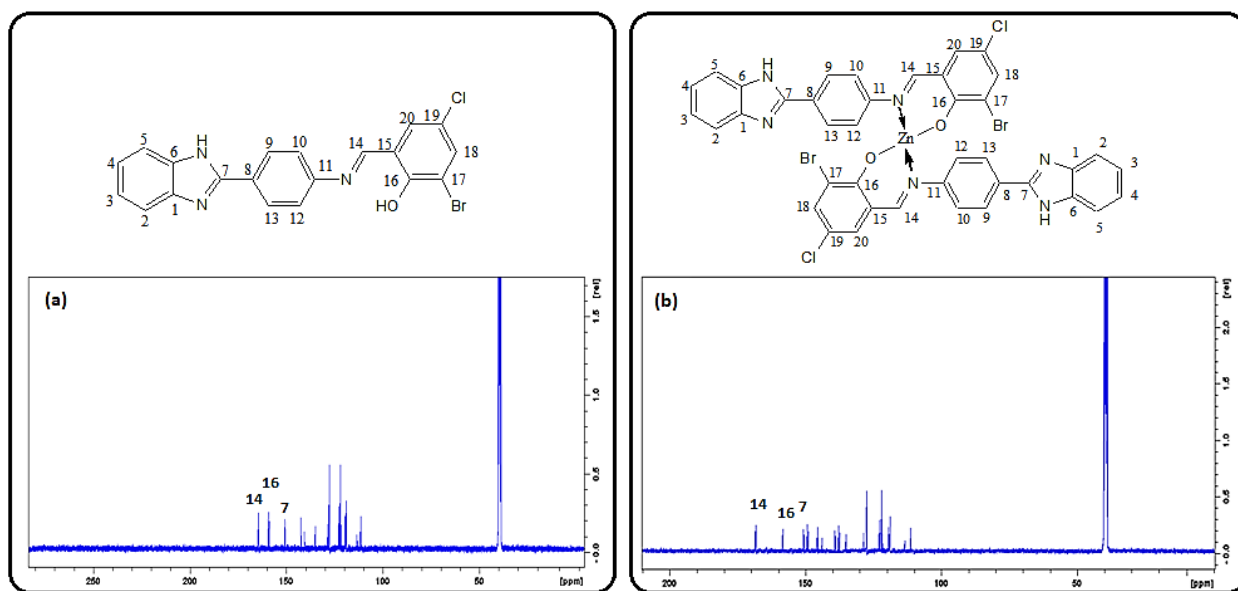

Figure S8.  $^{13}\text{C}$  NMR spectrum of ligand  $L_1$  (a) and Zn(II) complex **4** (b) in DMSO- $d_6$

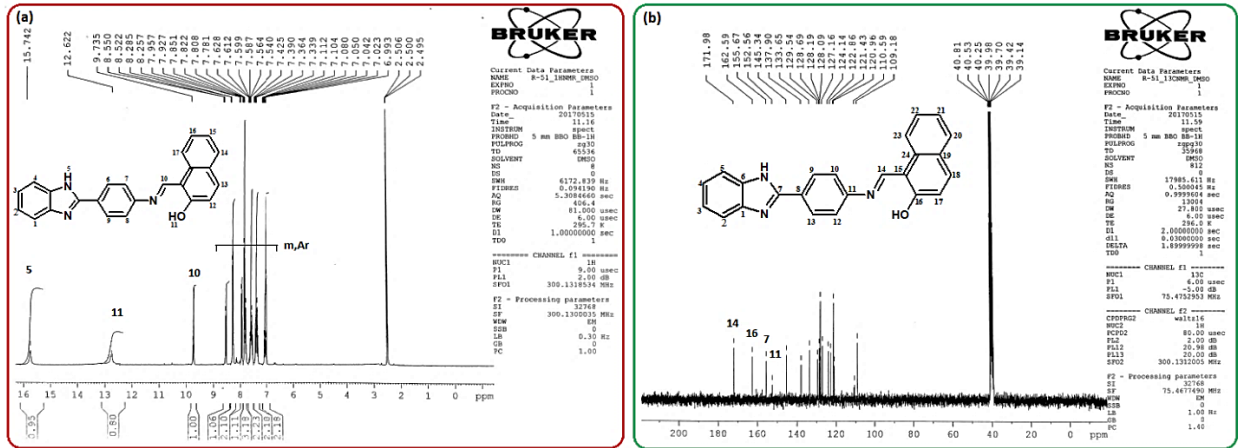

Figure S9. <sup>1</sup>H NMR (a) and <sup>13</sup>C NMR (b) spectra of ligand L<sub>2</sub> in DMSO-d<sub>6</sub>

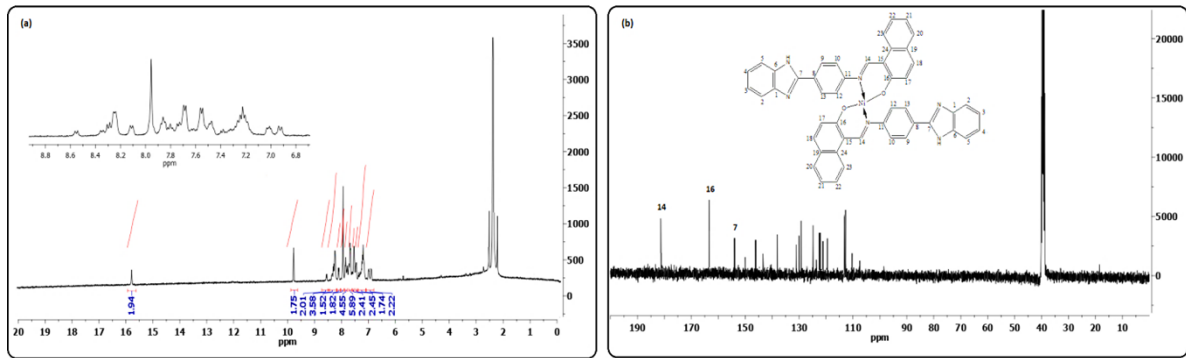

Figure S10. <sup>1</sup>H NMR (a) and <sup>13</sup>C NMR (b) spectra of Zn(II) complex 6 in DMSO-d<sub>6</sub>

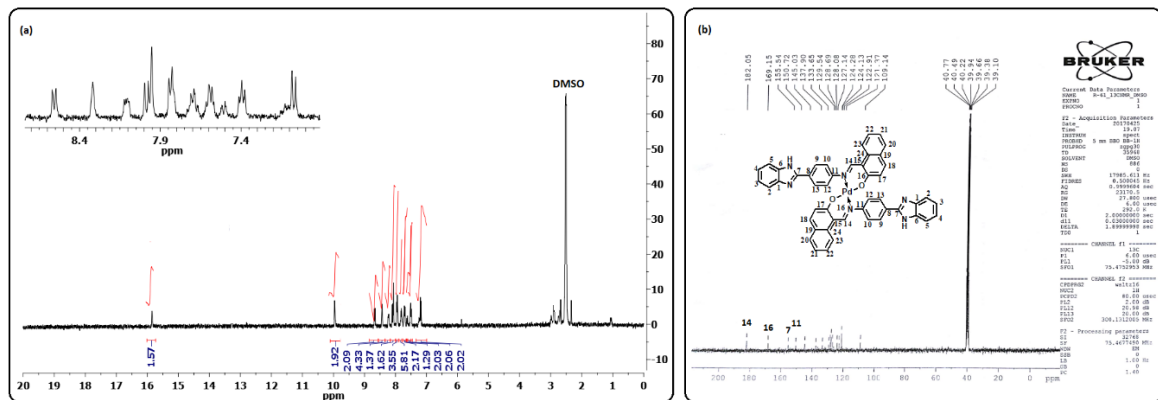

Figure S11. <sup>1</sup>H NMR (a) and <sup>13</sup>C NMR (b) spectra of Pd(II) complex 7 in DMSO-d<sub>6</sub>

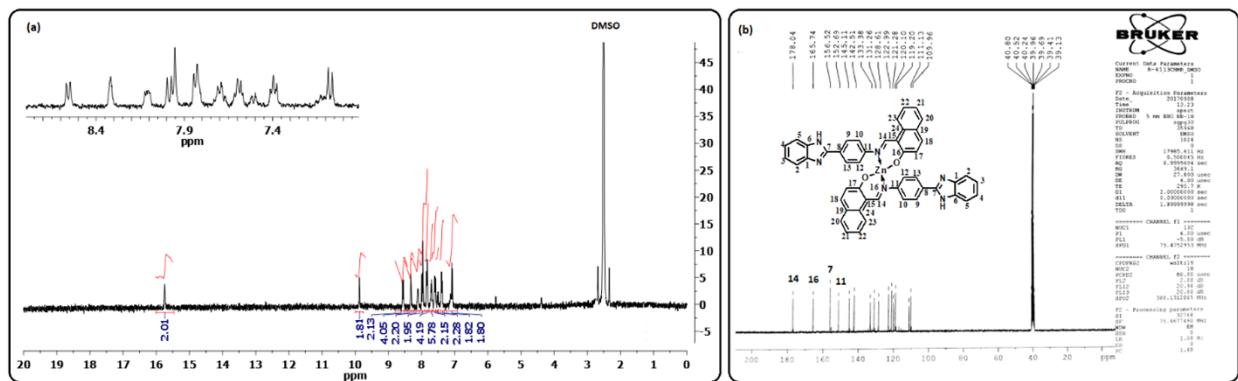

Figure S12.  $^1\text{H}$  NMR (a) and  $^{13}\text{C}$  NMR (b) spectra of Zn(II) complex **8** in DMSO- $d_6$

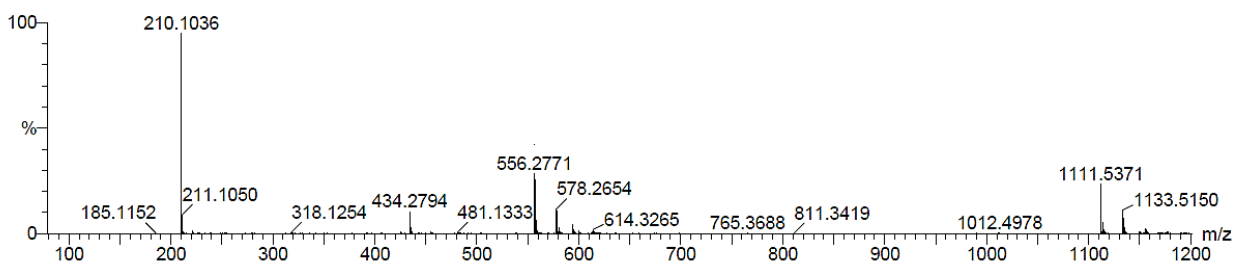

|          |            |     |      |       |       |            |
|----------|------------|-----|------|-------|-------|------------|
| Minimum: |            |     |      | 0.5   |       |            |
| Maximum: |            | 5.0 | 10.0 | 100.0 |       |            |
| Mass     | Calc. Mass | mDa | PPM  | DBE   | i-FIT | Formula    |
| 210.1036 | 210.1031   | 0.5 | 2.4  | 9.5   | 201.6 | C13 H12 N3 |

Figure S13. High resolution mass spectrum of A-1

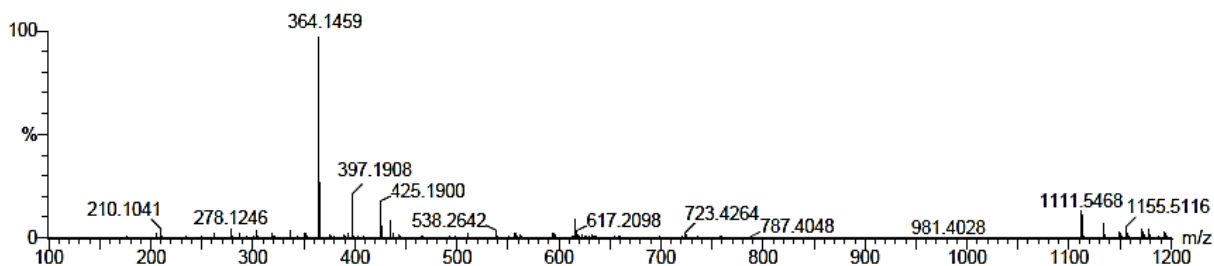

|          |            |     |      |       |       |              |
|----------|------------|-----|------|-------|-------|--------------|
| Minimum: |            |     |      | 0.5   |       |              |
| Maximum: |            | 5.0 | 10.0 | 200.0 |       |              |
| Mass     | Calc. Mass | mDa | PPM  | DBE   | 1-FIT | Formula      |
| 364.1459 | 364.1450   | 0.9 | 2.5  | 17.5  | 3.5   | C24 H18 N3 O |

Figure S14. High Resolution Mass spectrum of L<sub>2</sub>

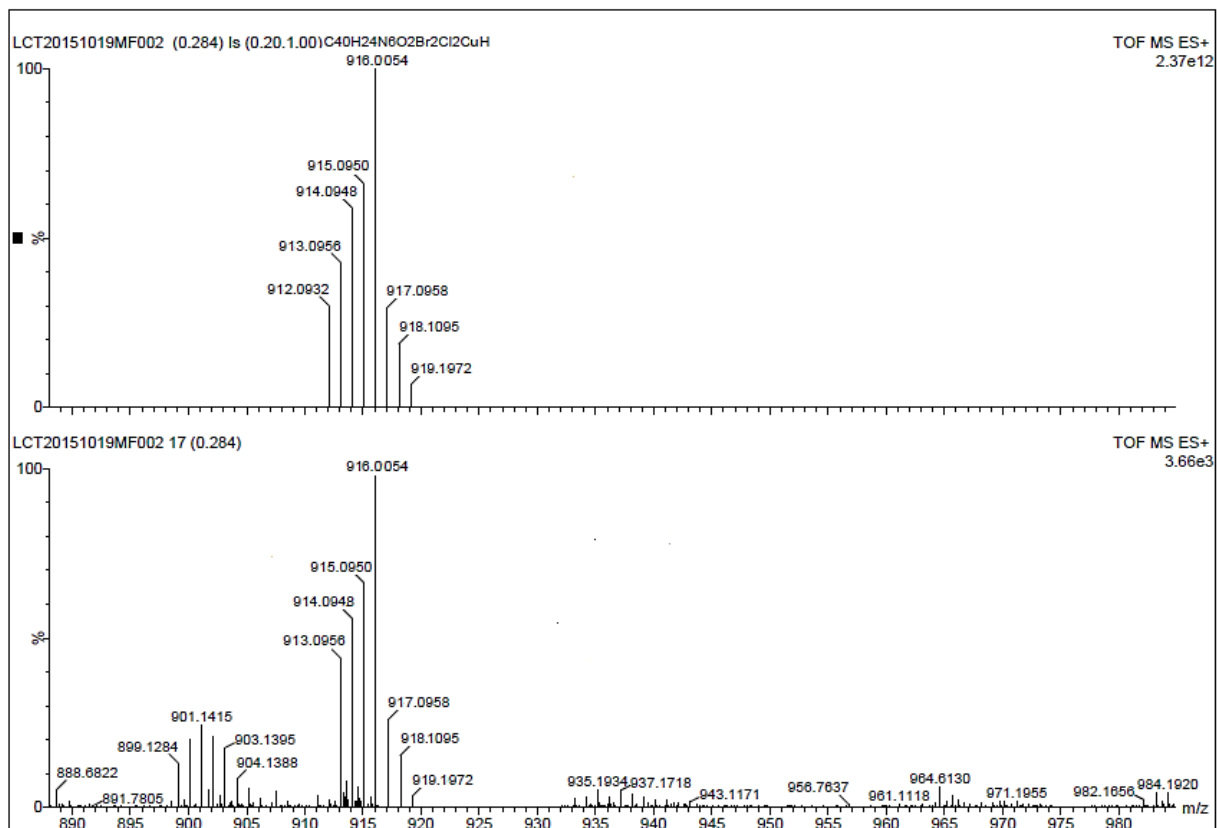

Figure S15. High Resolution Mass spectrum of complex 1

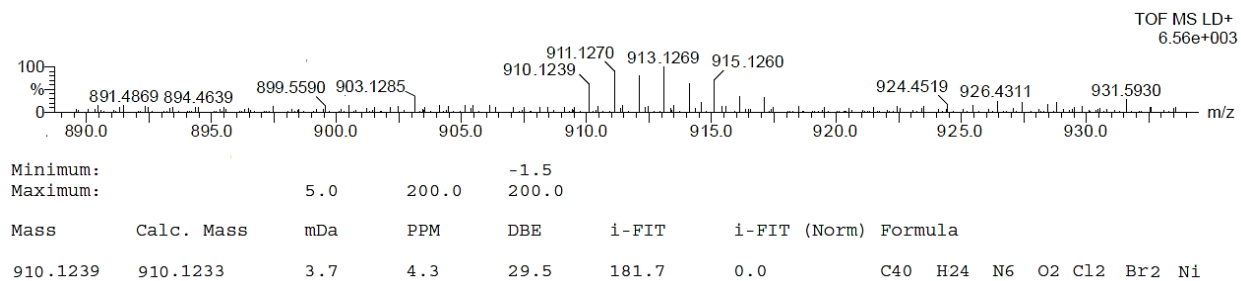

Figure S16. High Resolution Mass spectrum of complex 2



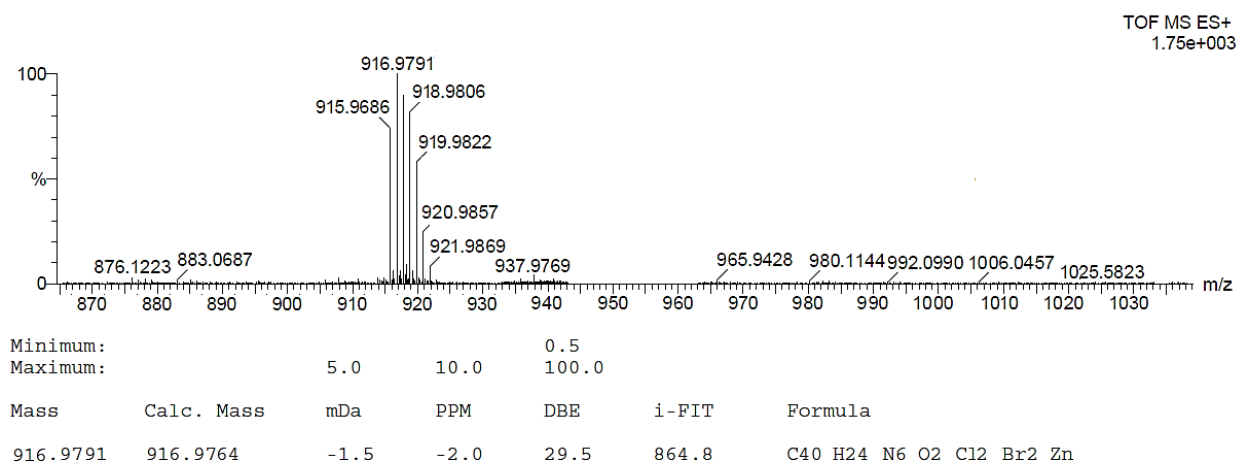

Figure S17. High Resolution Mass spectrum of complex 4

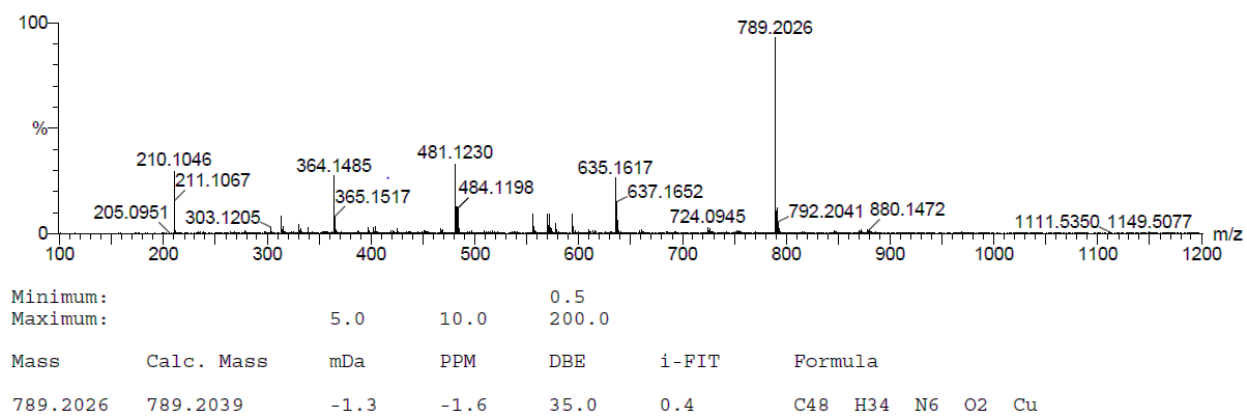

Figure S18. High Resolution Mass spectrum of complex 5

LCT20151126MF014 43 (0.717)

TOF MS ES+  
2.59e+004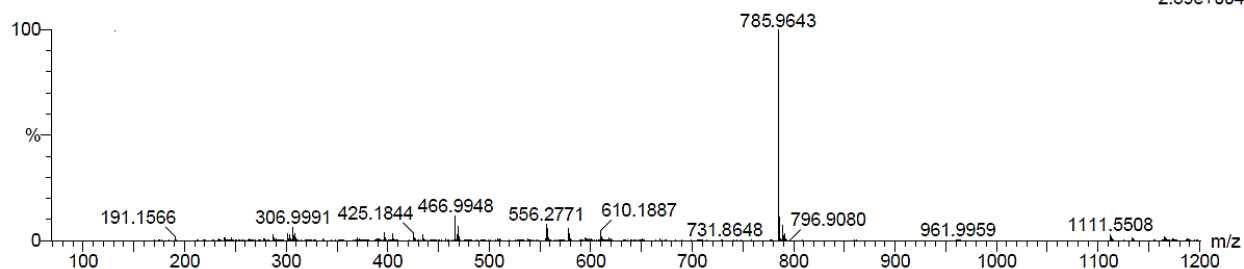

| Mass     | Calc. Mass | mDa  | PPM  | DBE  | i-FIT | Formula          |
|----------|------------|------|------|------|-------|------------------|
| 785.9643 | 785.9635   | -0.1 | -0.2 | 16.0 | 1.0   | C48 H33 N6 O2 Ni |

Figure S19. High Resolution Mass spectrum of complex 6

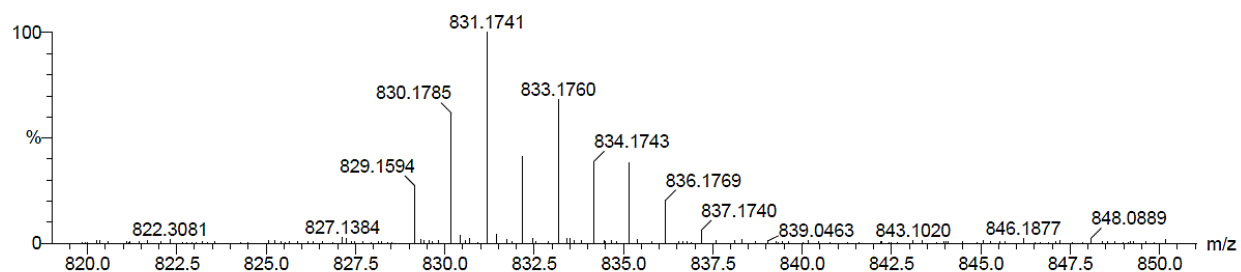

| Mass     | Calc. Mass | mDa | PPM | DBE  | i-FIT | Formula          |
|----------|------------|-----|-----|------|-------|------------------|
| 831.1741 | 831.1700   | 4.1 | 4.9 | 35.5 | 1.5   | C48 H33 N6 O2 Pd |

Figure S20. High Resolution Mass spectrum of complex 7

LCT20151117MF020 23 (0.383)

TOF MS ES+  
7.08e+003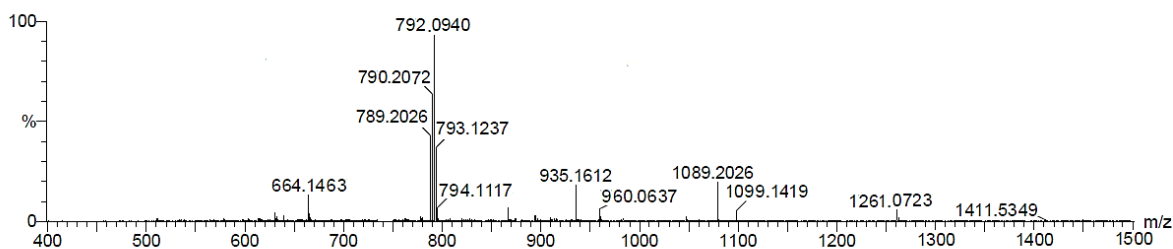

| Mass     | Calc. Mass | mDa  | PPM  | DBE  | i-FIT | Formula          |
|----------|------------|------|------|------|-------|------------------|
| 792.0940 | 792.0961   | -0.5 | -1.5 | 25.0 | 0.6   | C48 H33 N6 O2 Zn |

Figure S21. High Resolution Mass spectrum of complex 8

**Table S1:** Determination of minimum inhibitory concentration (MIC  $\mu\text{g}/\text{mL}$ ) of test compounds

| Compounds | <i>M. luteus</i> |   |   |   |   |   | <i>S. aureus</i> |   |   |   |   |   | <i>E. coli</i> |   |   |   |   |   | <i>E. aerogenes</i> |   |   |   |   |   |
|-----------|------------------|---|---|---|---|---|------------------|---|---|---|---|---|----------------|---|---|---|---|---|---------------------|---|---|---|---|---|
|           | a                | b | c | d | e | f | a                | b | c | d | e | f | a              | b | c | d | e | f | a                   | b | c | d | e | f |
| L1        | -                | - | + | + | + | + | +                | + | + | + | + | + | -              | - | - | + | + | + | -                   | - | - | + | + | + |
| L2        | +                | + | + | + | + | + | +                | + | + | + | + | + | -              | - | + | + | + | + | -                   | - | - | + | + | + |
| 1         | +                | + | + | + | + | + | -                | - | + | + | + | + | -              | - | - | + | + | + | -                   | - | + | + | + | + |
| 2         | -                | - | - | - | + | + | -                | - | - | - | + | + | -              | - | - | - | - | + | -                   | - | - | + | + | + |
| 3         | -                | - | + | + | + | + | +                | + | + | + | + | + | +              | + | + | + | + | + | +                   | + | + | + | + | + |
| 4         | -                | + | + | + | + | + | +                | + | + | + | + | + | -              | - | - | + | + | + | -                   | - | - | + | + | + |
| 5         | +                | + | + | + | + | + | +                | + | + | + | + | + | +              | + | + | + | + | + | +                   | + | + | + | + | + |
| 6         | -                | - | - | + | + | + | -                | - | + | + | + | + | -              | - | - | - | + | + | -                   | - | + | + | + | + |
| 7         | -                | - | + | + | + | + | -                | - | + | + | + | + | +              | + | + | + | + | + | +                   | + | + | + | + | + |
| 8         | -                | - | + | + | + | + | +                | + | + | + | + | + | -              | - | - | + | + | + | +                   | + | + | + | + | + |

$a=200 \mu\text{g}/\text{mL}$ ,  $b=100 \mu\text{g}/\text{mL}$ ,  $c=50 \mu\text{g}/\text{mL}$ ,  $d=25 \mu\text{g}/\text{mL}$ ,  $e=12.5 \mu\text{g}/\text{mL}$ ,  $f=6.25 \mu\text{g}/\text{mL}$

Minus (-) indicate the absence of growth, Plus (+) indicate the presence of growth

**Table S2:** Results of DPPH free radical scavenging assay

| Compounds            | Percentage Scavenging            |                                   |                                   |                                  |                                   | IC <sub>50</sub> $\mu\text{g}/\text{mL}^{-1}$ |
|----------------------|----------------------------------|-----------------------------------|-----------------------------------|----------------------------------|-----------------------------------|-----------------------------------------------|
|                      | 200 $\mu\text{g}/\text{mL}^{-1}$ | 66.6 $\mu\text{g}/\text{mL}^{-1}$ | 22.2 $\mu\text{g}/\text{mL}^{-1}$ | 7.4 $\mu\text{g}/\text{mL}^{-1}$ | 2.46 $\mu\text{g}/\text{mL}^{-1}$ |                                               |
| <b>L1</b>            | 52.88                            | 50.23                             | 48.47                             | 45.56                            | 14.38                             | 60.25                                         |
| <b>L2</b>            | 52.67                            | 50.94                             | 47.35                             | 42.88                            | 32.39                             | 61.45                                         |
| <b>1</b>             | 65.57                            | 53.58                             | 49.44                             | 21.66                            | 11.15                             | 26.47                                         |
| <b>2</b>             | 62.39                            | 57.17                             | 51.63                             | 41.01                            | 20.3                              | 19.25                                         |
| <b>3</b>             | 78.52                            | 62.11                             | 53.64                             | 23.97                            | 19.71                             | 17.34                                         |
| <b>4</b>             | 51.11                            | 50.74                             | 45.2                              | 31.41                            | 12                                | 60.15                                         |
| <b>5</b>             | 68.42                            | 59.39                             | 45.32                             | 31.66                            | 28.15                             | 51.21                                         |
| <b>6</b>             | 85                               | 67.17                             | 65.63                             | 51.01                            | 40.3                              | 7.1                                           |
| <b>7</b>             | 73.8                             | 62.6                              | 62.44                             | 52.34                            | 49.71                             | 3.32                                          |
| <b>8</b>             | 50.05                            | 49.32                             | 46.56                             | 38.17                            | 12.81                             | 88.98                                         |
| <b>Ascorbic acid</b> | 82.43                            | 66.59                             | 61.74                             | 55.41                            | 40.31                             | 4.23                                          |

Table S3: Results of brine shrimp cytotoxicity assay

| Comp.          | Percentage mortality after 24 hours |           |           | LD <sub>50</sub> µg/ml |
|----------------|-------------------------------------|-----------|-----------|------------------------|
|                | 200µg/ml                            | 66.6µg/ml | 22.2µg/ml |                        |
| L <sub>1</sub> | 70                                  | 20        | 20        | 127.61                 |
| L <sub>2</sub> | 30                                  | 10        | 10        | >200                   |
| 1              | 40                                  | 30        | 10        | >200                   |
| 2              | 30                                  | 20        | 10        | >200                   |
| 3              | 20                                  | 10        | 10        | >200                   |
| 4              | -                                   | -         | -         | -                      |
| 5              | -                                   | -         | -         | -                      |
| 6              | 30                                  | 20        | 10        | >200                   |
| 7              | 60                                  | 40        | 10        | 125                    |
| 8              | -                                   | -         | -         | -                      |
| Doxorubicin    | 95                                  | 90        | 70        | 3.22                   |
